# Supplementary material for: The Influence of a Polyphenol-Rich Red Berry Fruit Juice on Recovery Process and Leg Strength Capacity after Six Days of Intensive Endurance Exercise in Recreational Endurance Athletes
Source: MDPI journal article supplement (doi:10.3390/nu16101428), 2024-05-09
Supplement: s1 [file s1]

---

## Supplementary Materials

**Table S1:** Measurement parameters and ingredients of the placebo and red fruit juice drink.

| parameter                          | amount in Placebo | amount in juice (lot 1) | amount in juice (lot 2) |
|------------------------------------|-------------------|-------------------------|-------------------------|
| specific gravity [kg/L]            | 1,04867           | 1,0614                  | 1,06129                 |
| Brix [°Bx]                         | 12,0              | 15,22                   | 15,45                   |
| conductance                        | 2060              | 2380                    | 2260                    |
| extract [g/L]                      | 126,3             | 159,6                   | 159                     |
| sugar-free extract [g/L]           | 18,2              | 40,7                    | 41,9                    |
| sugar [g/L]                        | 108,1             | 118,9                   | 117,1                   |
| glucose [g/L]                      | 52,4              | 58,4                    | 56,3                    |
| fructose [g/L]                     | 55,7              | 60,6                    | 58,6                    |
| sucrose [g/L]                      | < 0,5             | < 0,5                   | 2,3                     |
| glucose/fructose-ratio             | 0,94              | 0,96                    | 0,96                    |
| pH-value                           | 3,29              | 3,42                    | 3,34                    |
| total acid pH 8,1 cal. Cs<br>[g/L] | 6,47              | 7,24                    | 7,03                    |
| ascorbic acid [mg/L]               | n.n.              | 5                       | 7                       |
| volatile acid [g/L]                | 0,02              | 0,04                    | 0,04                    |
| L-malic acid [g/L]                 | < 0,05            | 2,91                    | 2,86                    |
| citric acid [g/L]                  | 6,76              | 4,45                    | 4,85                    |
| <b>total phenols [mg/L]</b>        | <b>91</b>         | <b>4052</b>             | <b>4159</b>             |
| zinc [mg/L]                        | < 0,1             | 0,6                     | 0,6                     |
| ferrum [mg/L]                      | < 0,1             | 1,5                     | 1,4                     |
| potassium [mg/L]                   | 1498              | 1429                    | 1467                    |
| calcium                            | < 1               | 158                     | 164                     |
| magnesium [mg/L]                   | < 1               | 97                      | 94                      |
| copper [mg/L]                      | < 0,1             | 0,1                     | 0,1                     |

**Table S2:** Overview of the six-day endurance training protocol documentation.

| ID   | Training time juice [min] | Training km juice [km] | ER km juice [km] | Interval km juice [km] | Pace/ overall juice [min/km] | Training time placebo [min] | Training km placebo [km] | ER km placebo [km] | Interval km placebo [km] | Pace / overall placebo [min/km] |
|------|---------------------------|------------------------|------------------|------------------------|------------------------------|-----------------------------|--------------------------|--------------------|--------------------------|---------------------------------|
| P01  | 210.00                    | 38.02                  | 17.98            | 20.04                  | 5.52                         | 210.00                      | 36.32                    | 17.34              | 18.98                    | 5.78                            |
| P02  | 210.00                    | 42.42                  | 18.87            | 23.55                  | 4.95                         | 210.00                      | 39.70                    | 17.78              | 21.92                    | 5.29                            |
| P03  | 210.00                    | 56.65                  | 21.41            | 35.24                  | 3.71                         | 210.00                      | 51.66                    | 21.33              | 30.33                    | 4.07                            |
| P04  | 210.00                    | 51.75                  | 23.92            | 27.83                  | 4.06                         | 210.00                      | 52.55                    | 24.33              | 28.22                    | 4.00                            |
| P05  | 210.00                    | 61.88                  | 22.51            | 39.37                  | 3.39                         | 210.00                      | 59.38                    | 22.64              | 36.74                    | 3.54                            |
| P06  | 210.00                    | 52.70                  | 20.28            | 32.42                  | 3.98                         | 210.00                      | 46.44                    | 20.03              | 26.41                    | 4.52                            |
| P07  | 210.00                    | 41.15                  | 17.55            | 23.60                  | 5.10                         | 210.00                      | 40.13                    | 17.57              | 22.56                    | 5.23                            |
| P08  | 210.00                    | 42.75                  | 17.77            | 24.98                  | 4.91                         | 210.00                      | 44.87                    | 18.98              | 25.89                    | 4.68                            |
| P09  | 210.00                    | 39.86                  | 18.90            | 20.96                  | 5.91                         | 210.00                      | 38.10                    | 18.98              | 19.12                    | 5.51                            |
| P10  | 210.00                    | 64.02                  | 22.05            | 41.97                  | 3.28                         | 210.00                      | 67.81                    | 23.53              | 44.28                    | 3.10                            |
| P11  | 210.00                    | 48.72                  | 21.21            | 27.51                  | 4.31                         | 210.00                      | 50.37                    | 23.25              | 27.12                    | 4.17                            |
| P12  | 210.00                    | 44.24                  | 18.99            | 25.25                  | 4.75                         | 210.00                      | 49.04                    | 23.10              | 25.94                    | 4.28                            |
| P13  | 210.00                    | 41.65                  | 19.31            | 22.34                  | 5.04                         | 210.00                      | 42.28                    | 20.74              | 21.54                    | 4.97                            |
| P14  | 210.00                    | 40.23                  | 18.25            | 21.98                  | 5.22                         | 210.00                      | 44.11                    | 21.13              | 22.98                    | 4.76                            |
| P15  | 210.00                    | 39.46                  | 18.12            | 21.34                  | 5.32                         | 210.00                      | 40.30                    | 19.32              | 20.98                    | 5.21                            |
| P16  | 210.00                    | 65.90                  | 26.38            | 39.52                  | 3.19                         | 210.00                      | 64.22                    | 24.12              | 40.10                    | 3.27                            |
| P17  | 210.00                    | 40.56                  | 18.10            | 22.46                  | 5.18                         | 210.00                      | 38.58                    | 18.49              | 20.09                    | 5.44                            |
| P18  | 210.00                    | 42.31                  | 18.03            | 24.28                  | 4.96                         | 210.00                      | 42.63                    | 18.04              | 24.59                    | 4.93                            |
| mean | 210.00                    | 47.76                  | 20.09            | 27.67                  | 4.58                         | 210.00                      | 47.40                    | 20.74              | 26.66                    | 4.58                            |
| SD   | 0.00                      | 9.34                   | 2.49             | 7.24                   | 0.84                         | 0.00                        | 9.33                     | 2.40               | 7.42                     | 0.81                            |

**Table S3:** Strength test and blood parameters before and after a 6-day intensive endurance training time interval for the placebo and juice interventions.

| Parameter      | Unit             | N               | JUICE                          |                                 |                                       | PLACEBO                        |                                 |                                       | <i>p</i> -value |       |              |              |
|----------------|------------------|-----------------|--------------------------------|---------------------------------|---------------------------------------|--------------------------------|---------------------------------|---------------------------------------|-----------------|-------|--------------|--------------|
|                |                  |                 | T0                             | T1                              | Δ                                     | T0                             | T1                              | Δ                                     | time            | group | time x group | time         |
| CK             | [U/L]<br>Log10   | 17              | 199.24 ± 149.60<br>2.20 ± 0.07 | 316.35 ± 159.29*<br>2.44 ± 0.06 | <b>117.12 ± 191.75</b><br>0.24 ± 0.07 | 215.18 ± 118.25<br>2.26 ± 0.07 | 379.53 ± 221.60*<br>2.51 ± 0.07 | <b>164.35 ± 267.00</b><br>0.25 ± 0.07 | <b>0.001</b>    | 0.371 | 0.976        | <b>0.170</b> |
| oxLDL          | [U/L]<br>Log10   | 18              | 64 ± 51.40<br>1.66 ± 0.09      | 68.78 ± 58.70<br>1.67 ± 0.10    | 4.78 ± 37.52<br>0.01 ± 0.07           | 60.39 ± 61.37<br>1.59 ± 0.11   | 83.22 ± 92.08<br>1.71 ± 0.11    | 22.83 ± 71.56<br>0.12 ± 0.07          | 0.120           | 0.632 | 0.354        | 0.040        |
| est. 1 RM      | [kg]             | 18              | 104.22 ± 24.21                 | 105.56 ± 24.54                  | <b>1.34 ± 9.26</b>                    | 104.28 ± 22.00                 | 100.95 ± 17.74                  | <b>-3.33 ± 11.49</b>                  | 0.168           | 0.988 | 0.172        | 0.030        |
| rel. est. 1 RM | [kg/kg<br>KG]    | 18              | 1.40 ± 0.26                    | 1.44 ± 0.26                     | 0.04 ± 0.14                           | 1.41 ± 0.20                    | 1.38 ± 0.20                     | -0.03 ± 0.17                          | 0.438           | 0.941 | 0.269        | 0.010        |
| IL-6           | [pg/ml]<br>Log10 | 18 <sup>a</sup> | 0.77 ± 0.58<br>-0.26 ± 0.12    | 0.74 ± 0.64<br>-0.30 ± 0.14     | -0.1 ± 0.55<br>-0.01 ± 0.12           | 1.20 ± 1.27<br>-0.50 ± 0.35    | 1.09 ± 1.54<br>-0.25 ± 0.14     | 0.17 ± 1.24<br>0.14 ± 0.19            | 0.256           | 0.383 | 0.278        | 0.040        |
| IL-10          | [pg/ml]<br>Log10 | 18 <sup>a</sup> | 10.18 ± 12.26<br>0.81 ± 0.11   | 6.65 ± 5.06<br>0.62 ± 0.13      | -2.80 ± 9.67<br>-0.13 ± 0.11          | 7.35 ± 6.07<br>0.67 ± 0.13     | 6.86 ± 5.31<br>0.61 ± 0.14      | -0.004 ± 3.76<br>-0.01 ± 0.09         | 0.737           | 0.434 | 0.189        | 0.000        |

<sup>a</sup>In the evaluation of cytokines, there are 30 missing values for IL-6 and 17 missing values for IL-10. CK = Creatin kinase, oxLDL = oxidized low-density lipoprotein, est. 1 RM = estimated 1 repetition maximum, rel. est. 1 RM = relative estimated 1 repetition maximum, IL-6 = Interleukin 6, IL-10 = Interleukin.
